# Supplementary material for: Patterns of Diversity, Structure and Local Ecology of Arthropod-Pathogenic Fungi in the Amazonian Forest of Cusco and Madre de Dios Regions, Southern Peru
Source: MDPI journal article supplement (doi:10.3390/d15111122), 2023-10-31
Supplement: s1 [file s1]

**Table S1.** List of arthropod-pathogen fungi analysed in the basins of the Cusco and Madre de Dios regions.

| Family          | Specie                                                                          | Basins    |       |          |           |           |          | Voucher                                    |
|-----------------|---------------------------------------------------------------------------------|-----------|-------|----------|-----------|-----------|----------|--------------------------------------------|
|                 |                                                                                 | Amarumayu | Araza | Inambari | MadreDios | Tambopata | Urubamba |                                            |
| Clavicipitaceae | <i>Aschersonia aff.</i>                                                         | 1         |       |          |           |           |          | IHC 24445                                  |
| Clavicipitaceae | <i>Aschersonia sp1</i>                                                          |           |       |          |           |           | 2        | AH 1841<br>NS 1843                         |
| Clavicipitaceae | <i>Hypocrella sp1</i>                                                           |           |       |          |           |           | 3        | SM 1811<br>SM 1838<br>SM 1865a             |
| Clavicipitaceae | <i>Metarhizium sp1</i>                                                          |           |       | 1        |           |           |          | IHC 24377                                  |
| Clavicipitaceae | <i>Moelleriella phyllogena</i><br>(Mont.) P. Chaverri & K.T.<br>Hodge           |           | 1     |          |           |           |          | IHC 24380                                  |
| Clavicipitaceae | <i>Moelleriella sp1</i>                                                         |           |       |          |           |           | 3        | AH 1850 <sup>a</sup><br>NS 1835<br>TS 1869 |
| Clavicipitaceae | <i>Moelleriella sp2</i>                                                         | 1         |       |          |           |           |          | IHC 24456                                  |
| Clavicipitaceae | <i>Nigelia martialis</i> (Speg.)<br>Luangsa-ard & Thanakitp.                    |           |       |          | 2         |           |          | FEB-382<br>ITA-105                         |
| Clavicipitaceae | <i>Nigelia sp1</i>                                                              | 4         |       |          |           |           |          | IHC 24470<br>IHC 24476                     |
| Cordycipitaceae | <i>Akanthomyces aculeatus</i><br>Lebert                                         |           |       |          |           |           | 1        | JM 1815                                    |
| Cordycipitaceae | <i>Akanthomyces tuberculatus</i><br>(Lebert) Spatafora, Kepler &<br>B. Shrestha |           |       |          | 1         |           | 1        | FEB-029<br>SM 1832                         |
| Cordycipitaceae | <i>Akanthomyces sp1</i>                                                         |           |       | 1        |           |           |          | IHC 24376                                  |

|                 |                                                                                                  |   |   |   |   |   |   |                                            |
|-----------------|--------------------------------------------------------------------------------------------------|---|---|---|---|---|---|--------------------------------------------|
| Cordycipitaceae | <i>Akanthomyces sp2</i>                                                                          |   | 1 | 1 |   | 2 |   | IHC 24386<br>IHC 24502                     |
| Cordycipitaceae | <i>Akanthomyces sp3</i>                                                                          |   | 1 | 2 |   |   |   | IHC 24389<br>MGR 364<br>MGR 399            |
| Cordycipitaceae | <i>Akanthomyces sp4</i>                                                                          |   |   |   |   | 3 |   | MGR 14<br>MGR 193<br>MGR 299               |
| Cordycipitaceae | <i>Akanthomyces sp5</i>                                                                          |   |   |   |   |   | 1 | NS 1849a                                   |
| Cordycipitaceae | <i>Akanthomyces sp6</i>                                                                          |   |   |   | 1 |   |   | FEB-380                                    |
| Clavicipitaceae | <i>Ascopolyporus caulium</i> (Berk. & M.A. Curtis) Thanakitp. & Luangsa-ard                      |   |   |   |   |   | 1 | AH 1831                                    |
| Cordycipitaceae | <i>Ascopolyporus philodendri</i> J.F. Bisch.                                                     |   |   |   | 1 |   |   | FEB-444                                    |
| Cordycipitaceae | <i>Beauveria acridophila</i> (Sanjuan & Franco-Mol.) T. Sanjuan, B. Shrestha, Kepler & Spatafora |   | 1 | 2 | 2 | 4 |   | ITA-282<br>MGR 335                         |
| Cordycipitaceae | <i>Beauveria locustiphila</i> (Henn.) B. Shrestha, Kepler & Spatafora                            |   |   |   |   | 4 |   | IHC 24504<br>MGR 649<br>MGR 650<br>MGR 651 |
| Cordycipitaceae | <i>Beauveria sp1</i>                                                                             |   | 1 |   |   |   |   | IHC 24378                                  |
| Cordycipitaceae | <i>Beauveria sp2</i>                                                                             |   | 1 |   |   |   |   | IHC 24383                                  |
| Cordycipitaceae | <i>Beauveria sp3</i>                                                                             | 1 |   |   |   |   |   | IHC 24451                                  |
| Cordycipitaceae | <i>Beauveria sp4</i>                                                                             |   |   | 1 |   |   |   | IHC 24506                                  |
| Cordycipitaceae | <i>Beauveria sp5</i>                                                                             |   |   |   | 1 |   |   | FEB-044                                    |

|                 |                                                                                         |   |   |   |   |   |   |                                                                                 |
|-----------------|-----------------------------------------------------------------------------------------|---|---|---|---|---|---|---------------------------------------------------------------------------------|
| Cordycipitaceae | <i>Beauveria sp6</i>                                                                    |   |   |   |   |   | 2 | FA 1854<br>TS 1873                                                              |
| Cordycipitaceae | <i>Blackwellomyces cardinalis</i><br>(G.H. Sung & Spatafora)<br>Spatafora & Luangsa-ard |   |   |   | 1 |   | 2 | ITA-166<br>MQ 1829<br>SM 1827                                                   |
| Cordycipitaceae | <i>Blackwellomyces sp1</i>                                                              |   |   |   |   |   | 2 | TS 1804<br>TS 1805                                                              |
| Cordycipitaceae | <i>Cordyceps caloceroides</i> Berk. &<br>M.A. Curtis                                    |   |   |   | 1 |   |   | FEB-445                                                                         |
| Cordycipitaceae | <i>Cordyceps cylindrica</i> Petch                                                       |   |   |   |   | 1 |   | MGR 391                                                                         |
| Cordycipitaceae | <i>Cordyceps nidus</i> T. Sanjuan,<br>Chir. -Salom. & S. Restrepo                       | 1 |   | 1 |   |   | 3 | TS 1858<br>TS 1871<br>TS 1874<br>IHC 24453<br>IHC 24501                         |
| Cordycipitaceae | <i>Cordyceps tenuipes</i> (Peck)<br>Kepler, B. Shrestha &<br>Spatafora                  | 1 | 4 | 1 | 2 |   | 4 | IHC 24477<br>TS 1875a<br>TS 1875b<br>TS 1875c<br>ITA-333<br>ITA-335<br>SM 1850b |
| Cordycipitaceae | <i>Cordyceps sp1</i>                                                                    |   |   |   | 2 | 1 |   | FEB-353<br>ITA-332<br>MGR 507                                                   |
| Cordycipitaceae | <i>Cordyceps sp2</i>                                                                    |   |   |   | 1 | 1 |   | FEB-349<br>MGR 508                                                              |
| Cordycipitaceae | <i>Cordyceps sp3</i>                                                                    |   |   | 1 | 2 | 1 |   | FEB-414                                                                         |

|                 |                                                  |   |   |   |   |   |    |                               |
|-----------------|--------------------------------------------------|---|---|---|---|---|----|-------------------------------|
|                 |                                                  |   |   |   |   |   |    | FEB-425<br>MGR 240<br>MGR 556 |
| Cordycipitaceae | <i>Cordyceps sp4</i>                             |   |   | 1 | 1 |   |    | FEB-422<br>MGR 557            |
| Cordycipitaceae | <i>Cordyceps sp5</i>                             |   |   |   | 1 | 1 |    | FEB-442<br>MGR 643            |
| Cordycipitaceae | <i>Cordyceps sp6</i>                             |   |   |   | 1 | 1 |    | FEB-449<br>MGR 268            |
| Cordycipitaceae | <i>Cordyceps sp7</i>                             |   |   |   | 1 | 1 |    | FEB-450<br>MGR 285            |
| Cordycipitaceae | <i>Cordyceps sp8</i>                             |   |   |   |   |   | 3  | JM 1825<br>JM 1848<br>TS 1802 |
| Cordycipitaceae | <i>Cordyceps sp9</i>                             | 1 |   |   |   |   |    | IHC 24196                     |
| Cordycipitaceae | <i>Cordyceps sp10</i>                            | 1 |   |   |   |   |    | IHC 24168                     |
| Cordycipitaceae | <i>Cordyceps sp11</i>                            | 1 |   |   |   |   |    | IHC 24198                     |
| Cordycipitaceae | <i>Cordyceps sp12</i>                            | 1 |   |   |   |   |    | IHC 24457                     |
| Cordycipitaceae | <i>Cordyceps sp13</i>                            | 2 |   |   |   |   |    | IHC 24177<br>IHC 24480        |
| Cordycipitaceae | <i>Cordycipitaceae indet1</i>                    | 1 |   |   |   |   |    | IHC 24139                     |
| Cordycipitaceae | <i>Cordycipitaceae indet2</i>                    |   |   |   |   |   | 1  | MC 1846                       |
| Cordycipitaceae | <i>Cordycipitaceae indet3</i>                    |   |   |   |   |   | 1  | TS 1865                       |
| Cordycipitaceae | <i>Gibellula arachnophila</i><br>(Ditmar) Vuill. |   |   |   |   |   | 1  | TS 1824                       |
| Cordycipitaceae | <i>Gibellula pulchra</i> (Sacc.)<br>Cavara       |   | 1 |   |   |   |    | SM 1840                       |
| Cordycipitaceae | <i>Gibellula sp1</i>                             |   |   |   |   |   | 10 | MQ 1833                       |

|                      |                                                                                                |    |   |   |   |    |   |                                     |
|----------------------|------------------------------------------------------------------------------------------------|----|---|---|---|----|---|-------------------------------------|
|                      |                                                                                                |    |   |   |   |    |   | TS 1810<br>TS 1813<br>TS 1862       |
| Cordycipitaceae      | <i>Gibellula sp2</i>                                                                           | 1  |   |   |   |    |   | IHC 24449                           |
| Cordycipitaceae      | <i>Isaria sp1</i>                                                                              |    | 1 |   |   |    |   | IHC 24384                           |
| Cordycipitaceae      | <i>Isaria sp2</i>                                                                              |    | 1 |   |   |    |   | IHC 24387                           |
| Cordycipitaceae      | <i>Isaria sp3</i>                                                                              | 1  |   |   |   |    |   | IHC 24454                           |
| Cordycipitaceae      | <i>Isaria sp4</i>                                                                              |    |   |   |   |    | 1 | TS 1803                             |
| Cordycipitaceae      | <i>Samsoniella sp1</i>                                                                         |    | 1 |   |   |    | 2 | MQ 1852<br>TS 1823<br>TS 1850       |
| Cordycipitaceae      | <i>Isaria aff.</i>                                                                             |    |   | 1 |   |    |   | IHC 24503                           |
| Ophiocordycipitaceae | <i>Ophiocordyceps aff.<br/>kniphofioides</i>                                                   |    |   |   | 1 |    |   | FEB-388                             |
| Ophiocordycipitaceae | <i>Ophiocordyceps araracuarensis</i><br>Sanjuan & Spatafora                                    |    |   |   |   |    | 2 | MC 1864b<br>TS 1864                 |
| Ophiocordycipitaceae | <i>Ophiocordyceps australis</i><br>(Speg.) G.H. Sung, J.M.<br>Sung, Hywel-Jones &<br>Spatafora | 10 | 2 | 7 | 4 | 11 | 3 | IHC 24381<br>IHC 24388<br>IHC 24444 |
| Ophiocordycipitaceae | <i>Ophiocordyceps blattae</i> (Petch)<br>Petch                                                 |    |   |   |   |    | 1 | AH 1808                             |
| Ophiocordycipitaceae | <i>Ophiocordyceps camponoti</i><br>(Mains) B. Shrestha, G.H.<br>Sung & Spatafora               |    |   |   | 1 |    |   | FEB-018                             |
| Ophiocordycipitaceae | <i>Ophiocordyceps curculionum</i><br>(Tul. & C. Tul.) G.H. Sung,                               | 5  |   |   | 4 |    | 4 | IHC 24170<br>IHC 24175<br>IHC 24473 |

|                      |                                                                                                               |   |   |   |   |   |   |                                   |
|----------------------|---------------------------------------------------------------------------------------------------------------|---|---|---|---|---|---|-----------------------------------|
|                      | J.M. Sung, Hywel-Jones & Spatafora                                                                            |   |   |   |   |   |   |                                   |
| Ophiocordycipitaceae | <i>Ophiocordyceps dipterigena</i><br>(Berk. & Broome) G.H. Sung,<br>J.M. Sung, Hywel-Jones & Spatafora        |   | 1 |   |   |   | 3 | IHC 24385<br>MQ 1809<br>TS 1859   |
| Ophiocordycipitaceae | <i>Ophiocordyceps humbertii</i><br>(C.P. Robin) Petch                                                         |   |   |   | 1 |   |   | ITA-274                           |
| Ophiocordycipitaceae | <i>Ophiocordyceps kniphofioides</i><br>(H.C. Evans & Samson) G.H. Sung,<br>J.M. Sung, Hywel-Jones & Spatafora |   |   |   | 1 |   | 2 | ITA-201<br>TS 1860,1<br>TS 1860,2 |
| Ophiocordycipitaceae | <i>Ophiocordyceps melolonthae</i><br>(Tul. & C. Tul.) G.H. Sung,<br>J.M. Sung, Hywel-Jones & Spatafora        |   |   | 1 |   | 2 |   | IHC 24505<br>MGR 108<br>MGR 129   |
| Ophiocordycipitaceae | <i>Ophiocordyceps sphecocephala</i><br>(Klotzsch ex Berk.) G.H. Sung,<br>J.M. Sung, Hywel-Jones & Spatafora   |   |   | 1 | 1 |   | 1 | FEB-433<br>ITA-238<br>TS 1800     |
| Ophiocordycipitaceae | <i>Ophiocordyceps variabilis</i><br>(Petch) G.H. Sung, J.M. Sung,<br>Hywel-Jones & Spatafora                  |   |   |   |   |   | 1 | TS 1868                           |
| Ophiocordycipitaceae | <i>Ophiocordyceps sp1</i>                                                                                     |   | 1 |   |   |   |   | IHC 24379                         |
| Ophiocordycipitaceae | <i>Ophiocordyceps sp2</i>                                                                                     |   |   |   | 1 |   |   | ITA-301                           |
| Ophiocordycipitaceae | <i>Ophiocordyceps sp3</i>                                                                                     |   |   |   | 1 |   |   | FEB-371                           |
| Ophiocordycipitaceae | <i>Ophiocordyceps sp4</i>                                                                                     | 1 |   |   | 1 |   |   | FEB-431                           |

|                      |                                                                                            |    |   |   |   |   |   |                                     |
|----------------------|--------------------------------------------------------------------------------------------|----|---|---|---|---|---|-------------------------------------|
|                      |                                                                                            |    |   |   |   |   |   | IHC 24475                           |
| Ophiocordycipitaceae | <i>Paraisaria amazónica</i> (Henn.)<br>Luangsa-ard, Mongkols. &<br>Samson                  | 16 | 1 | 4 | 4 | 6 | 1 | IHC 24463<br>IHC 24464<br>IHC 24465 |
| Ophiocordycipitaceae | <i>Paraisaria gracilioides</i><br>(Kobayasi) C.R. Li, M.Z. Fan<br>& Z.Z. Li                |    |   |   | 1 |   |   | FEB-397                             |
| Ophiocordycipitaceae | (Grev.) Luangsa-ard,<br>Mongkols. & Samson                                                 |    |   |   |   |   | 1 | TS 1861                             |
| Ophiocordycipitaceae | <i>Purpureocillium</i><br><i>takamizusanense</i> (Kobayasi)<br>S. Ban, Azuma & Hiroki Sato |    |   |   |   |   | 1 | TS 1851                             |
| Ophiocordycipitaceae | <i>Ophiocordycipitaceae</i> indet1                                                         | 1  |   |   |   |   |   | IHC 24472                           |
| Entomophthoraceae    | <i>Massospora</i> sp1                                                                      | 1  |   |   |   |   |   | IHC 24197                           |
